# Supplementary material for: Single-molecule detection with enhanced Raman scattering of tungsten oxide nanostructure
Source: Royal Society of Chemistry journal article supplement (doi:10.1039/d2nr03596k), 2022-01-01
Supplement: d2nr03596k1.pdf [file d2nr03596k1.pdf]

## **Supplementary Information**

### **Single-molecule detection with enhanced Raman scattering of tungsten oxide nanostructure**

Yoshitaka Shingaya<sup>1\*</sup>, Hirokazu Takaki<sup>2</sup>, Nobuhiko Kobayashi<sup>2</sup>, Masakazu Aono<sup>1</sup>,  
and Tomonobu Nakayama<sup>1,2\*</sup>

<sup>1</sup>) International Center for Materials Nanoarchitectonics (WPI-MANA), National Institute for Materials Science (NIMS), 1-1 Namiki, Tsukuba 305-0044, Japan.

<sup>2</sup>) Faculty of Pure and Applied Sciences, University of Tsukuba, 1-1-1 Tennodai, Tsukuba, Ibaraki 305-8573, Japan.

## Supplementary information 1

### Enhancement factor (EF) calculation

The enhancement factor for single-molecule CO adsorbed on WO<sub>x</sub> was calculated according to general formula<sup>[1]</sup>.

$$EF = \frac{I_{SERS}}{I_{bulk}} \times \frac{N_{bulk}}{N_{SERS}} \#(1)$$

In the formula (1), I<sub>bulk</sub> and I<sub>SERS</sub> represent intensity of CO peak in Raman measurement of gas phase CO and SERS measurement respectively. N<sub>bulk</sub> and N<sub>SERS</sub> represent number of CO molecules in scattering volume in Raman measurement of gas phase CO and SERS measurement respectively. The scattering volume in Raman measurement of gas phase CO was assumed to be a cylinder of 1μm diameter and 1μm height.

$$V_{bulk} = \pi r^2 h = 7.85 \times 10^{-17} (m^3) \#(2)$$

The number of CO molecules in scattering volume can be obtained from ideal gas law.

$$N_{bulk} = \frac{N_A p V_{bulk}}{RT} = 2.12 \times 10^7 \#(3)$$

Here, N<sub>A</sub>, p, R, T represents Avogadro constant, pressure, molar gas constant, and absolute temperature. I<sub>SERS</sub>=1411, I<sub>bulk</sub>=2.4.

$$EF = \frac{1411}{2.4} \times \frac{2.12 \times 10^7}{1} = 1.2 \times 10^{10} \#(4)$$

Supplementary information 2

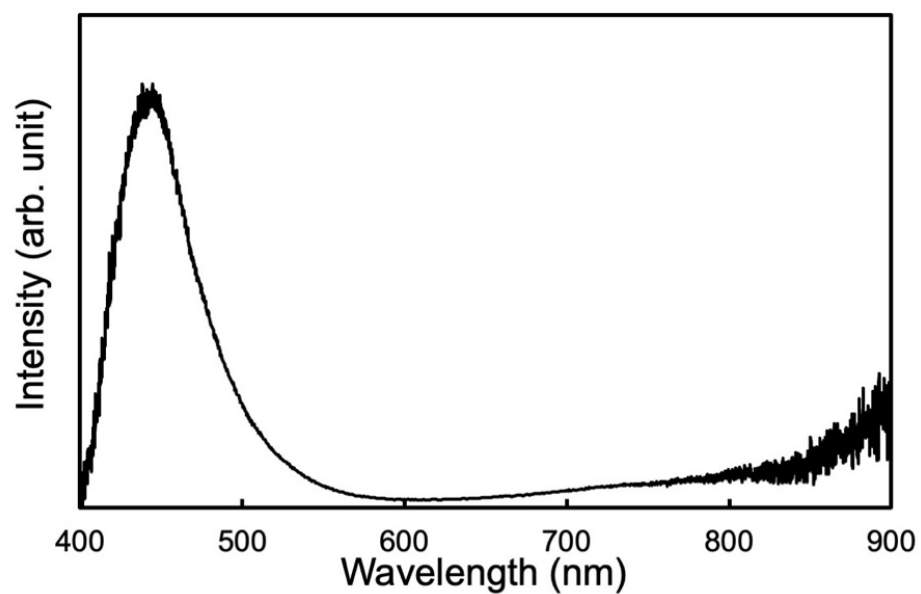

Figure S1 light scattering spectrum obtained from a single tungsten oxide nanorod in air. Using the same optics as Raman scattering spectroscopy, the light scattering spectrum from a  $\text{WO}_x$  nanorod was measured. A 100 W halogen lamp was used as a white light source.

### Supplementary information 3

#### Electrical measurement of a single WO<sub>x</sub> nanorod.

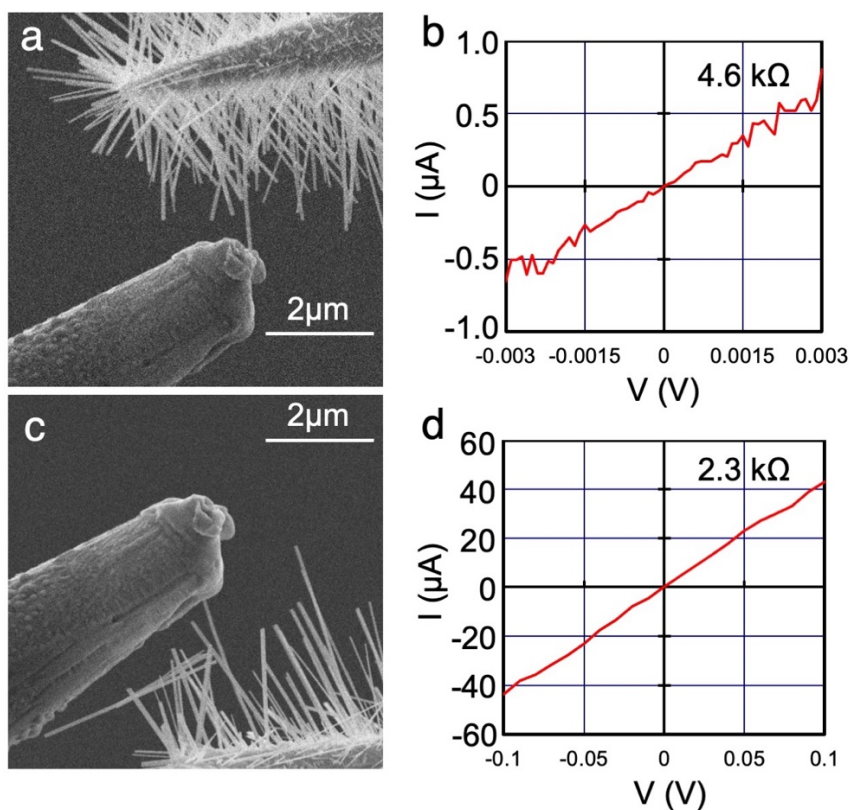

Figure S2 (a) and (c) show SEM images of WO<sub>x</sub> nanorods and piezo-driven probes during electrical measurements of a single WO<sub>x</sub> nanorod. (b) and (d) show IV curves obtained by electrical measurements of a single WO<sub>x</sub> nanorod shown in (a) and (c), respectively. The diameter, length and resistivity of measured nanorods are (a) D: 50 nm, L: 3.0 μm,  $\rho$ :  $3.0 \times 10^{-4} \Omega\text{cm}$  (c) D: 68 nm, L: 2.9 μm,  $\rho$ :  $2.9 \times 10^{-4} \Omega\text{cm}$ .

#### Reference

1. X. M. Lin, Y. Cui, Y. H. Xu, B. Ren and Z. Q. Tian. *Anal. Bioanal. Chem.* 2009, **394**, 1729-45.
